# Supplementary material for: Overcoming the Limits of Reconditioning: Seventeen Hours of EVLP With Successful Transplantation From Uncontrolled Circulatory Death Donor
Source: PubMed Central journal article supplement — Transplantation. 2021 Nov 22;105(12):2620–4. doi: 10.1097/TP.0000000000003646 (PMC8612888; doi:10.1097/tp.0000000000003646), 2021-11-22
Supplement: tp-105-2620-s001.pdf [file tp-105-2620-s001.pdf]

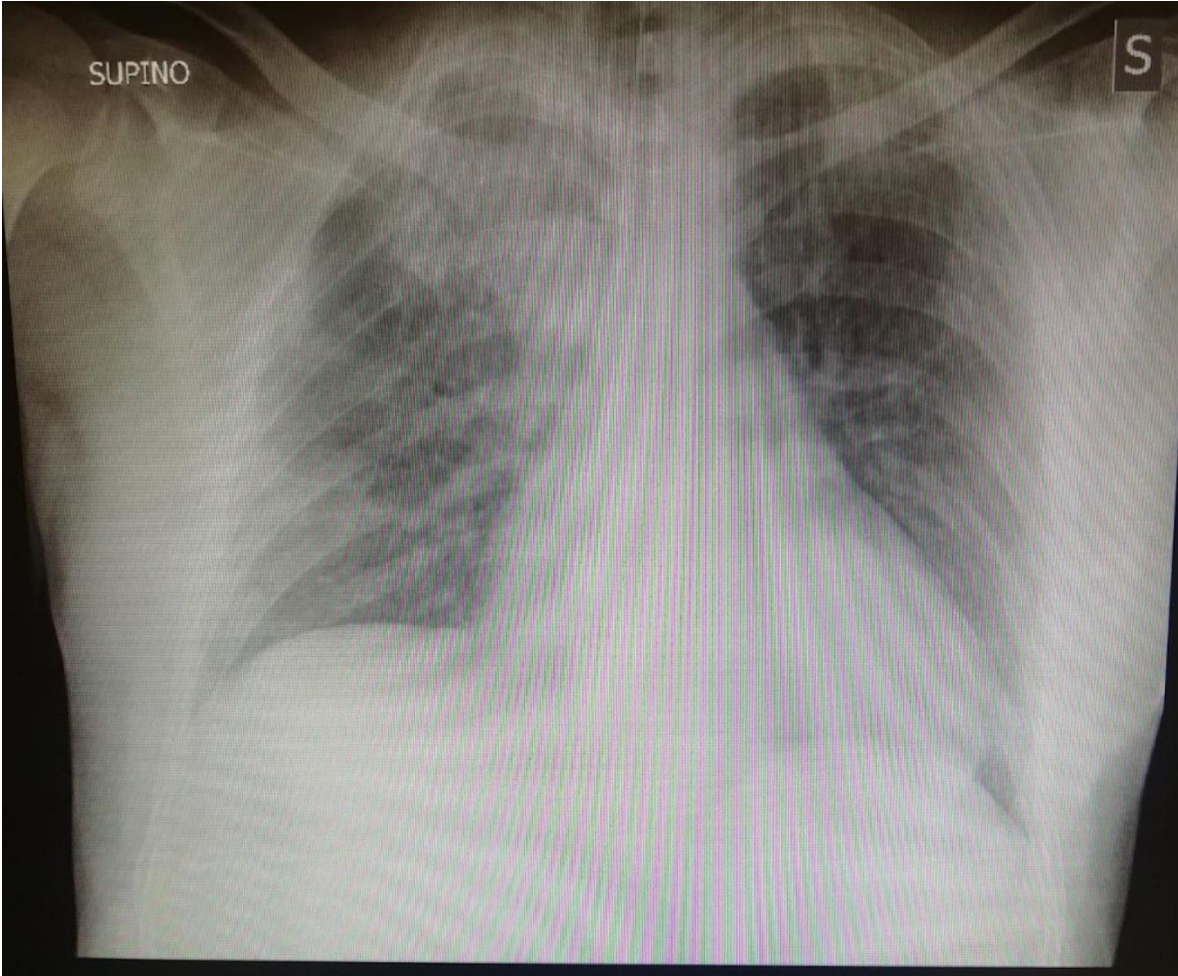

Figure S1. Donor chest radiograph.

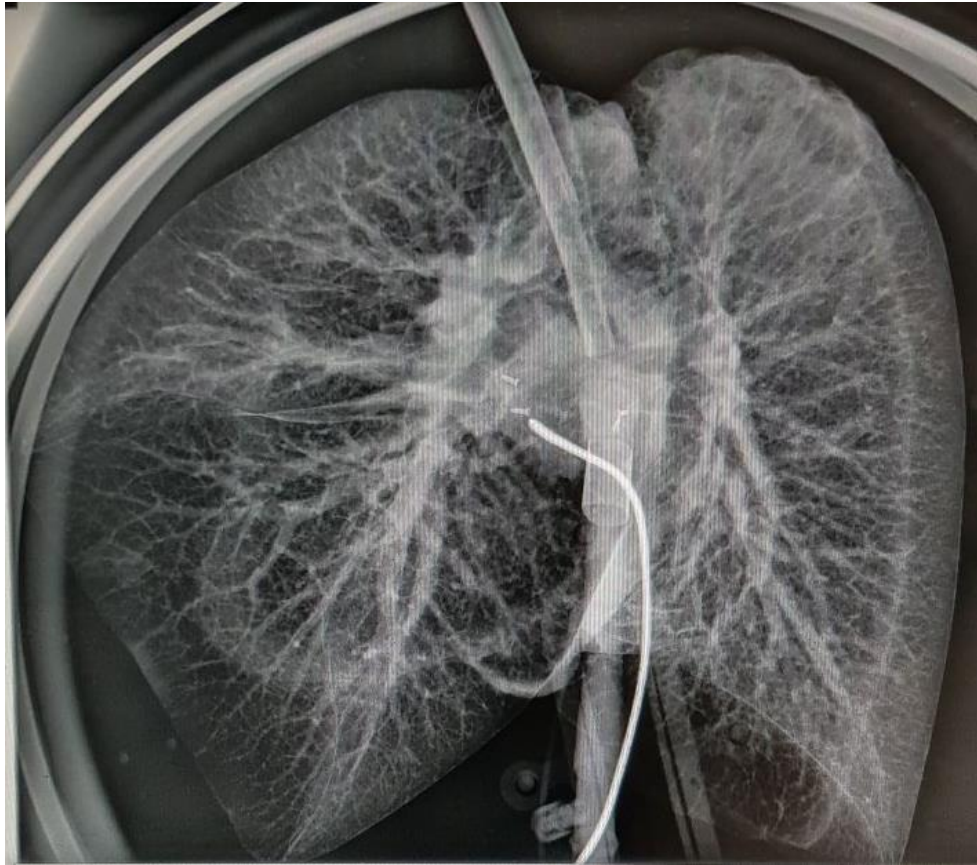

Figure S2. Lungs radiograph at the end of EVLP.

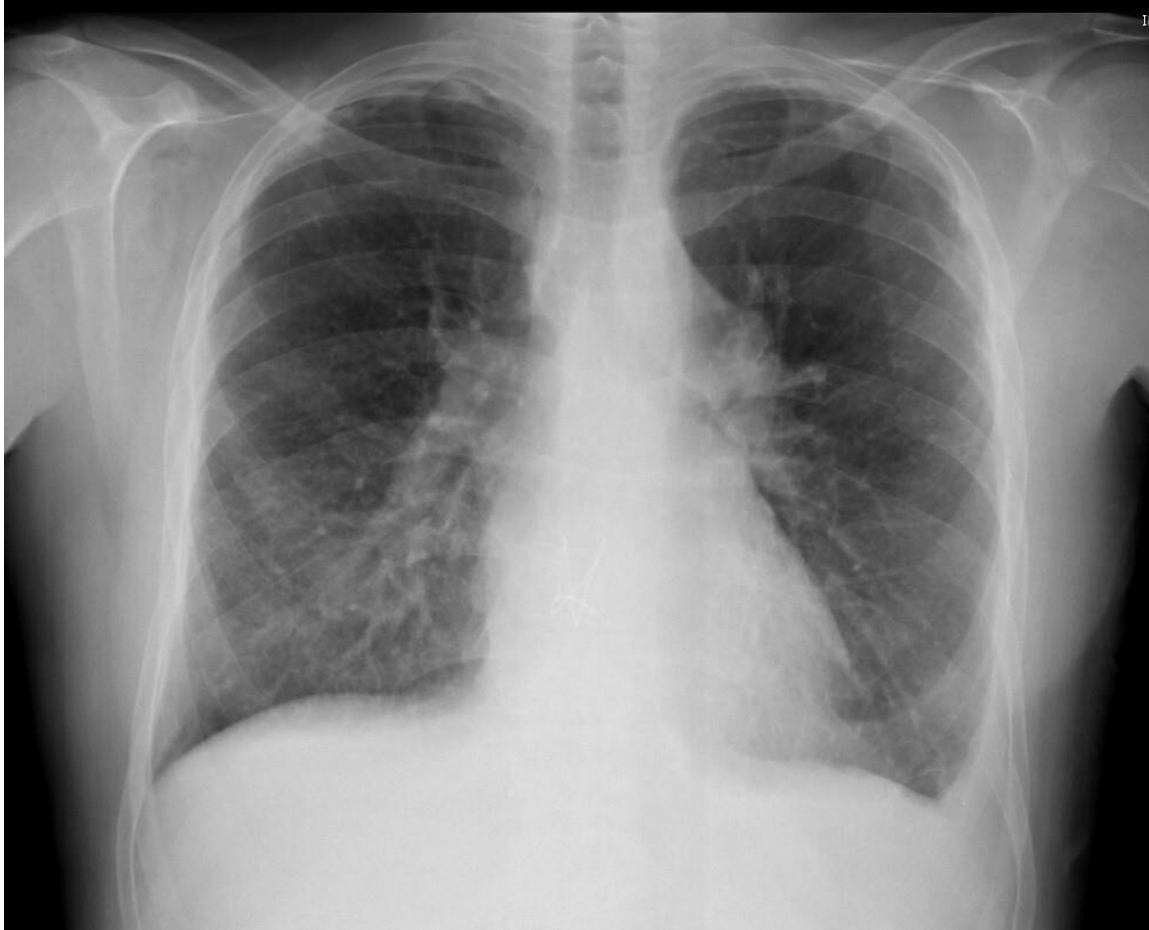

Figure S3. Recipient chest radiograph at one year after transplantation
